# Supplementary material for: Global population structure of the Serratia marcescens complex and identification of hospital-adapted lineages in the complex
Source: PubMed Central journal article supplement — Microb Genom. 2022 Mar 22;8(3):000793. doi: 10.1099/mgen.0.000793 (PMC9176281; doi:10.1099/mgen.0.000793), 2022-03-22
Supplement: mgen-8-0793-s001.pdf [file mgen-8-0793-s001.pdf]

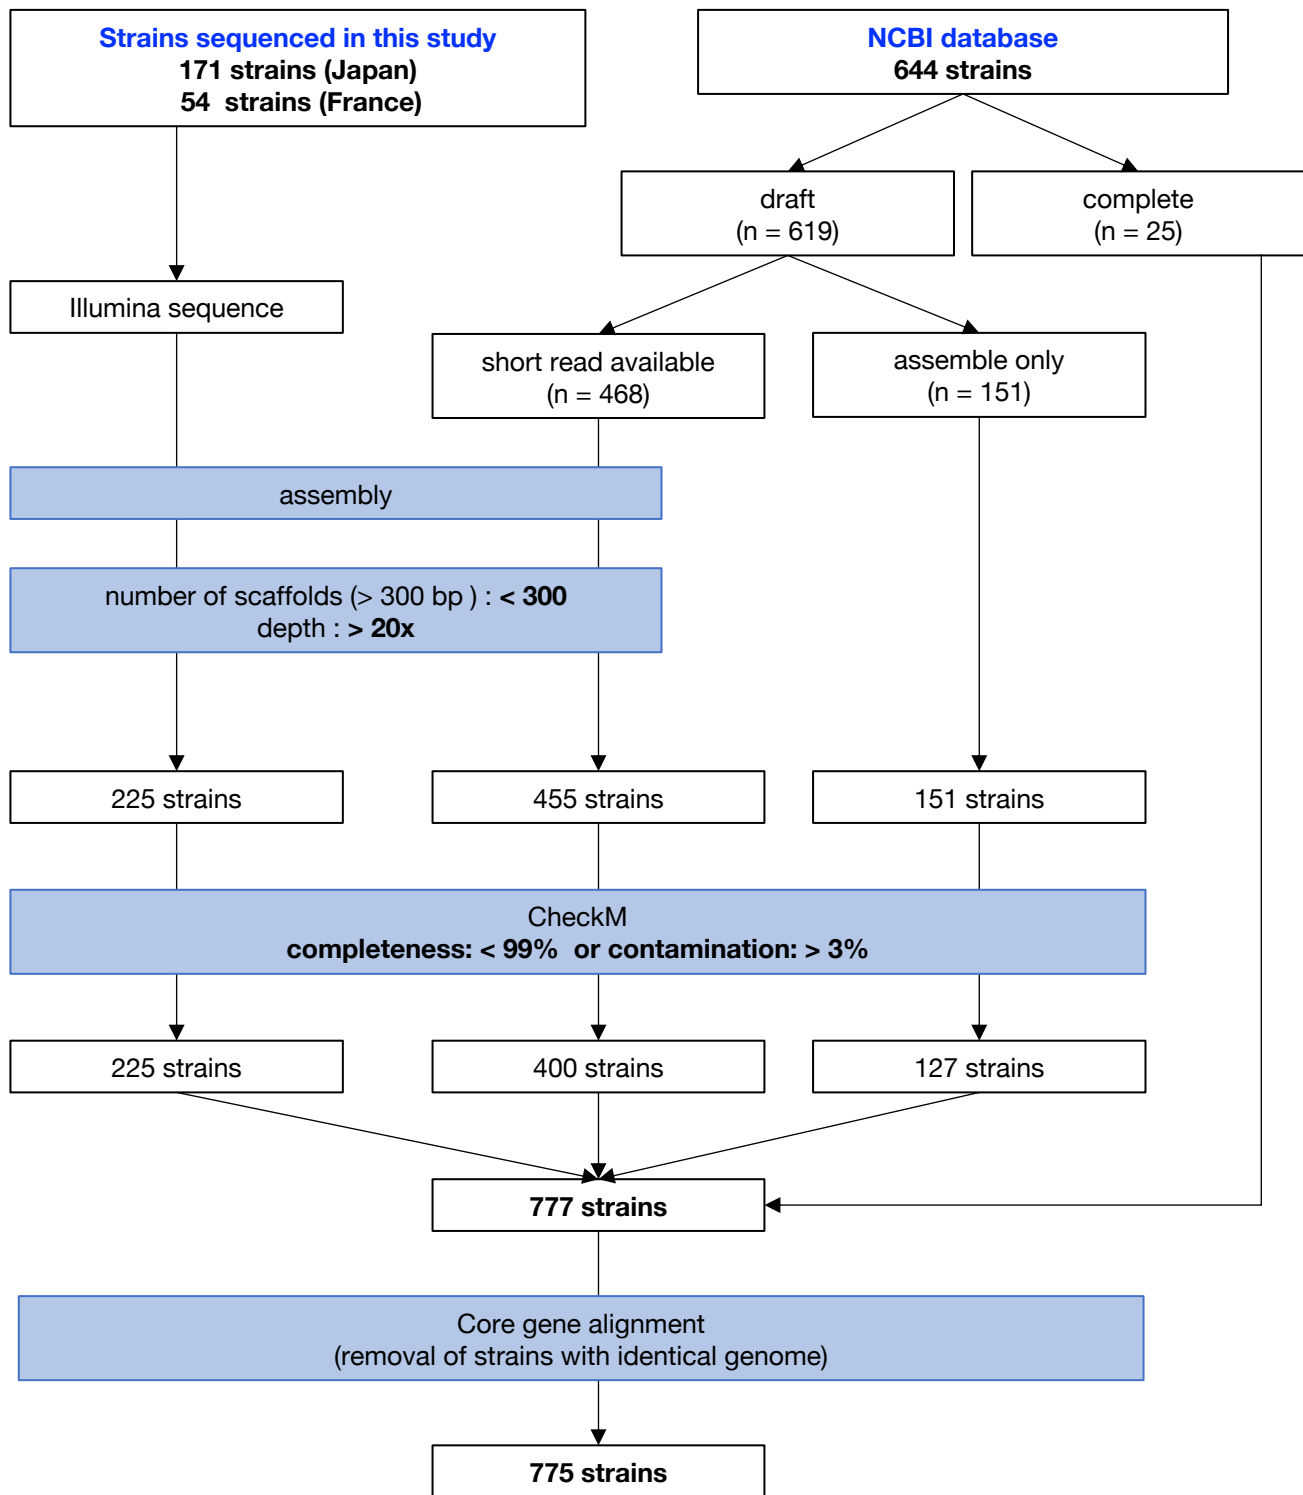

**Fig. S1 Processes of genome sequencing and quality filtering to obtain the genome dataset analyzed in this study.**

We sequenced 225 strains collected in Japan and France in this study. The genome sequence data of 644 strains were obtained from the NCBI database. When short read data were available, short read data were used for genome assembly using Platanus\_B. Low-quality draft genomes were removed by two-step filtering. Two genomes having core gene sequences identical to the other genomes were also removed from the final set.

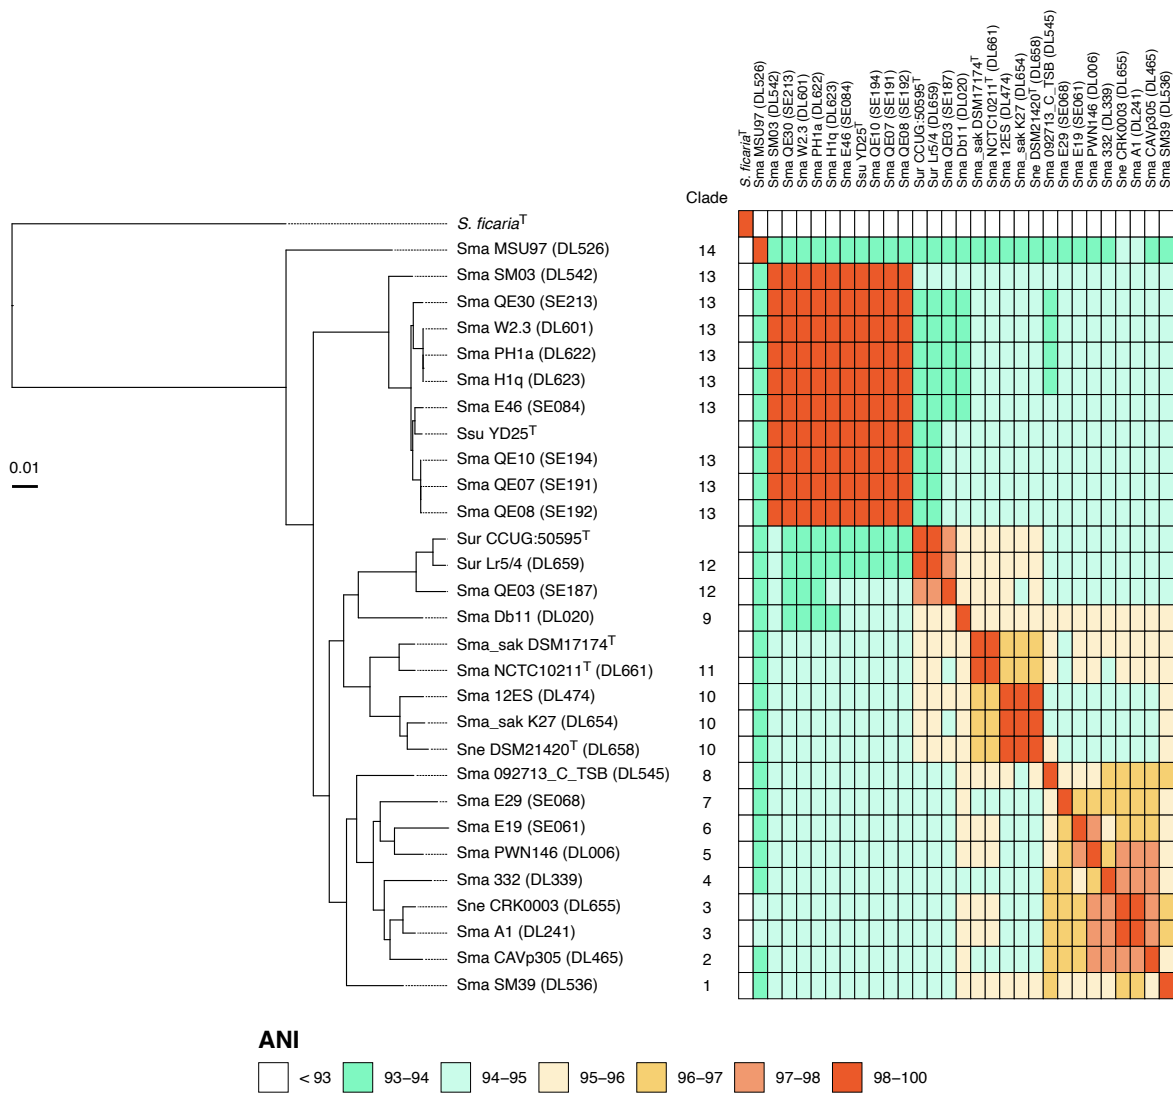

**Fig. S2 Genetic relatedness of the strains belonging to clades 13 and 14 and the two strains showing apparently incorrect species names to the type strains of the Sma complex and its closely related species.**

Nine clade 13 strains, one clade 14 strain, and two strains that were deposited with apparently incorrect species/subspecies names (strain IDs; DL654 and DL655) were analyzed for their genetic relatedness to the type strains of the Sma complex and its closely related species by constructing an ML phylogenetic tree and calculating ANI scores. From each of the other clades (other than clades 13 and 14), one strain was selected and included in the analyses. The ML tree was constructed based on the 561,515 SNP sites identified in the core genes, which were identified using Roary (n = 2,794). The type strain of *S. ficaria* was used as an outgroup. The ANI matrix shown on the right-hand side was obtained by all-to-all ANI analysis using PYANI in ANIb mode, and cells were coloured according to ANI values. Sma\_sak; *S. marcescens* subsp. *sakuensis*, Sma; *S. marcescens*, Sne; *S. nematodiphila*, Sur; *S. ureilytica*, Ssu; *S. surfactantfaciens*. The strain IDs used in this study are shown in parentheses. Note that the type strains of Sma\_sak, Sur, and Ssu were not included in our dataset described in the main text because their genome sequences were not available when we constructed the dataset. Therefore, their strain IDs are missing.

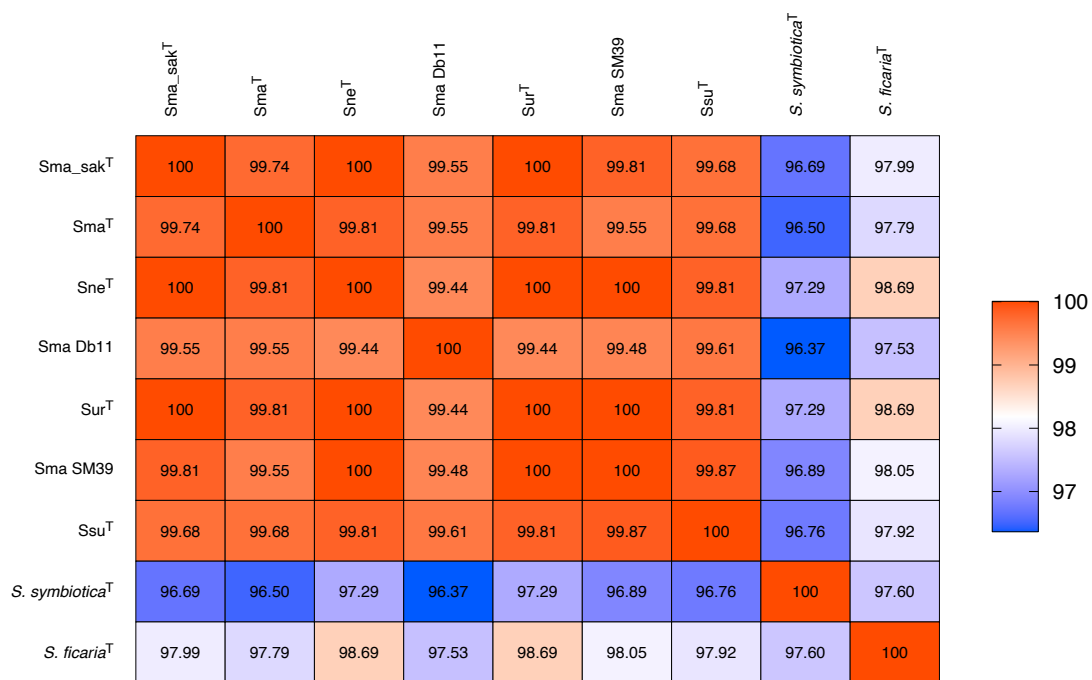

**Fig. S3 16S rRNA sequence identity matrix among the Sma complex and its closely related *Serratia* species.** For each strain, we generated the consensus sequences of 16S rRNA genes and aligned them with Clustal Omega to create a percent identity matrix. Cells are coloured according to identity values. Sma\_sak; *S. marcescens* subsp. *sakuensis*, Sma; *S. marcescens*, Sne; *S. nematodiphila*, Sur; *S. ureilytica*, Ssu; *S. surfactantfaciens*. Strains other than Db11 and SM39 are the type strains of each species and/or subspecies.

A

| Cluster size                          | 1   | 2  | 3  | 4 | 5 | 6 | 7 |
|---------------------------------------|-----|----|----|---|---|---|---|
| Numbers of SNP <sub>10</sub> clusters | 515 | 71 | 22 | 6 | 3 | 1 | 1 |

B

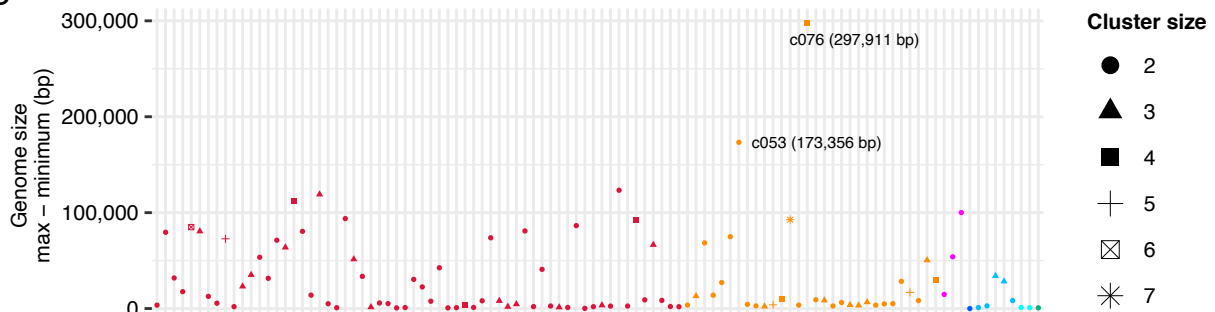

C

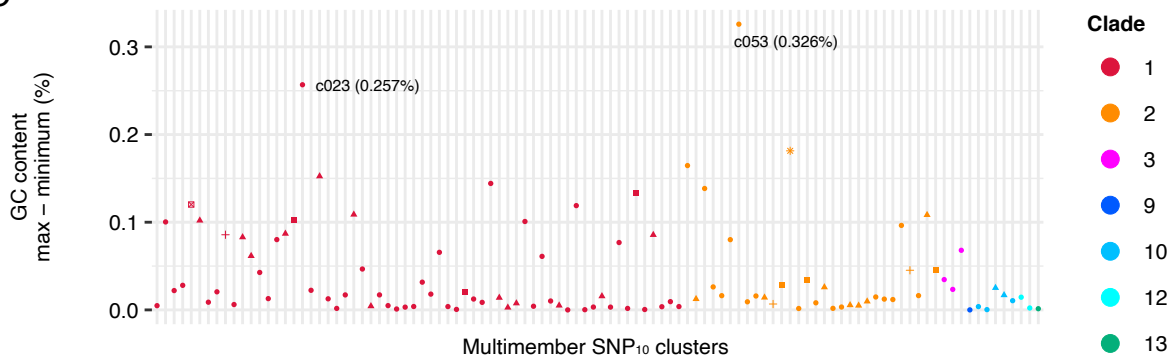

**Fig. S4 Genome size and GC content variations within each SNP<sub>10</sub> cluster.**

A. Distribution of cluster sizes (numbers of members belonging to the same cluster).

B and C. Intracluster differences in genome size (B) and GC content (C). Each mark indicates intracluster differences (max - minimum) in each multimember cluster. Cluster sizes and clades of each cluster are indicated by different shapes and colours. The cluster IDs and intracluster differences of the SNP<sub>10</sub> clusters exhibiting notable differences (genome size; >150 kb, GC content; >0.2%) are shown.

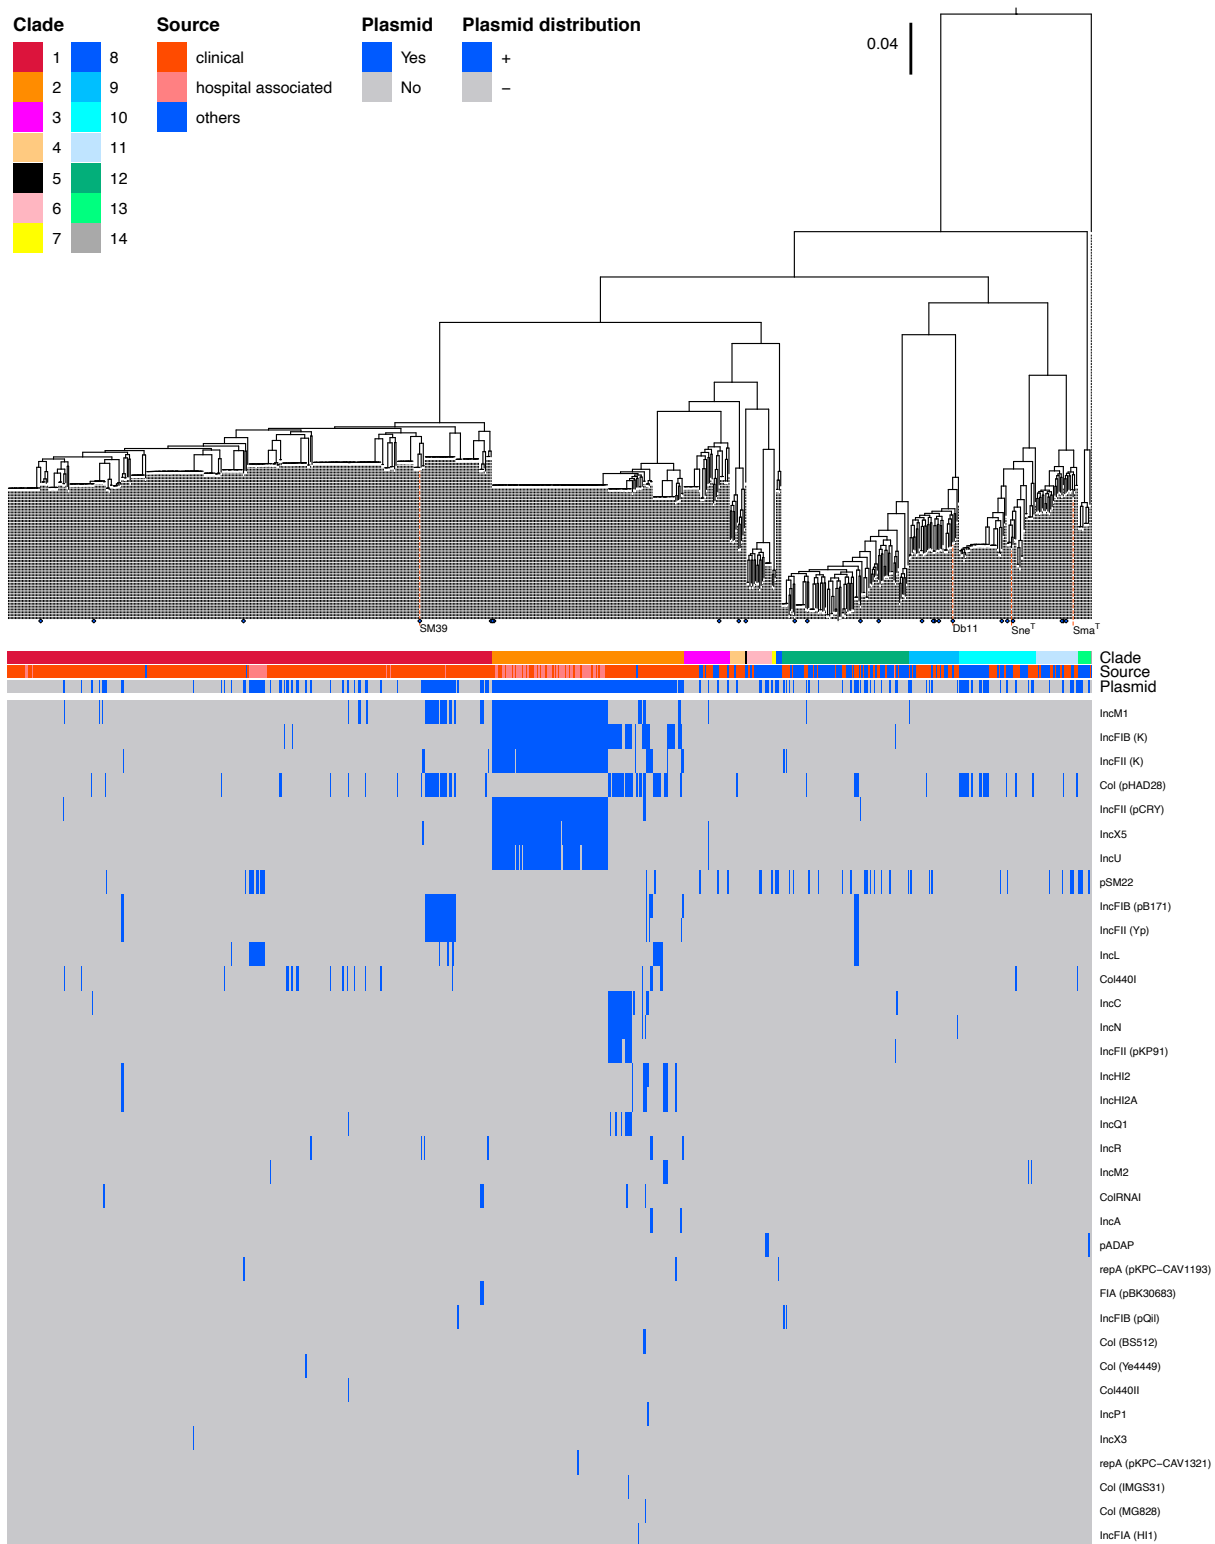

**Fig. S5 Distribution of plasmid replicons in the Sma complex.**

The distribution of 35 plasmid replicons identified by PlasmidFinder is shown. The same ML tree and strain information on the clade and isolation source presented in Fig. 4 are shown here.

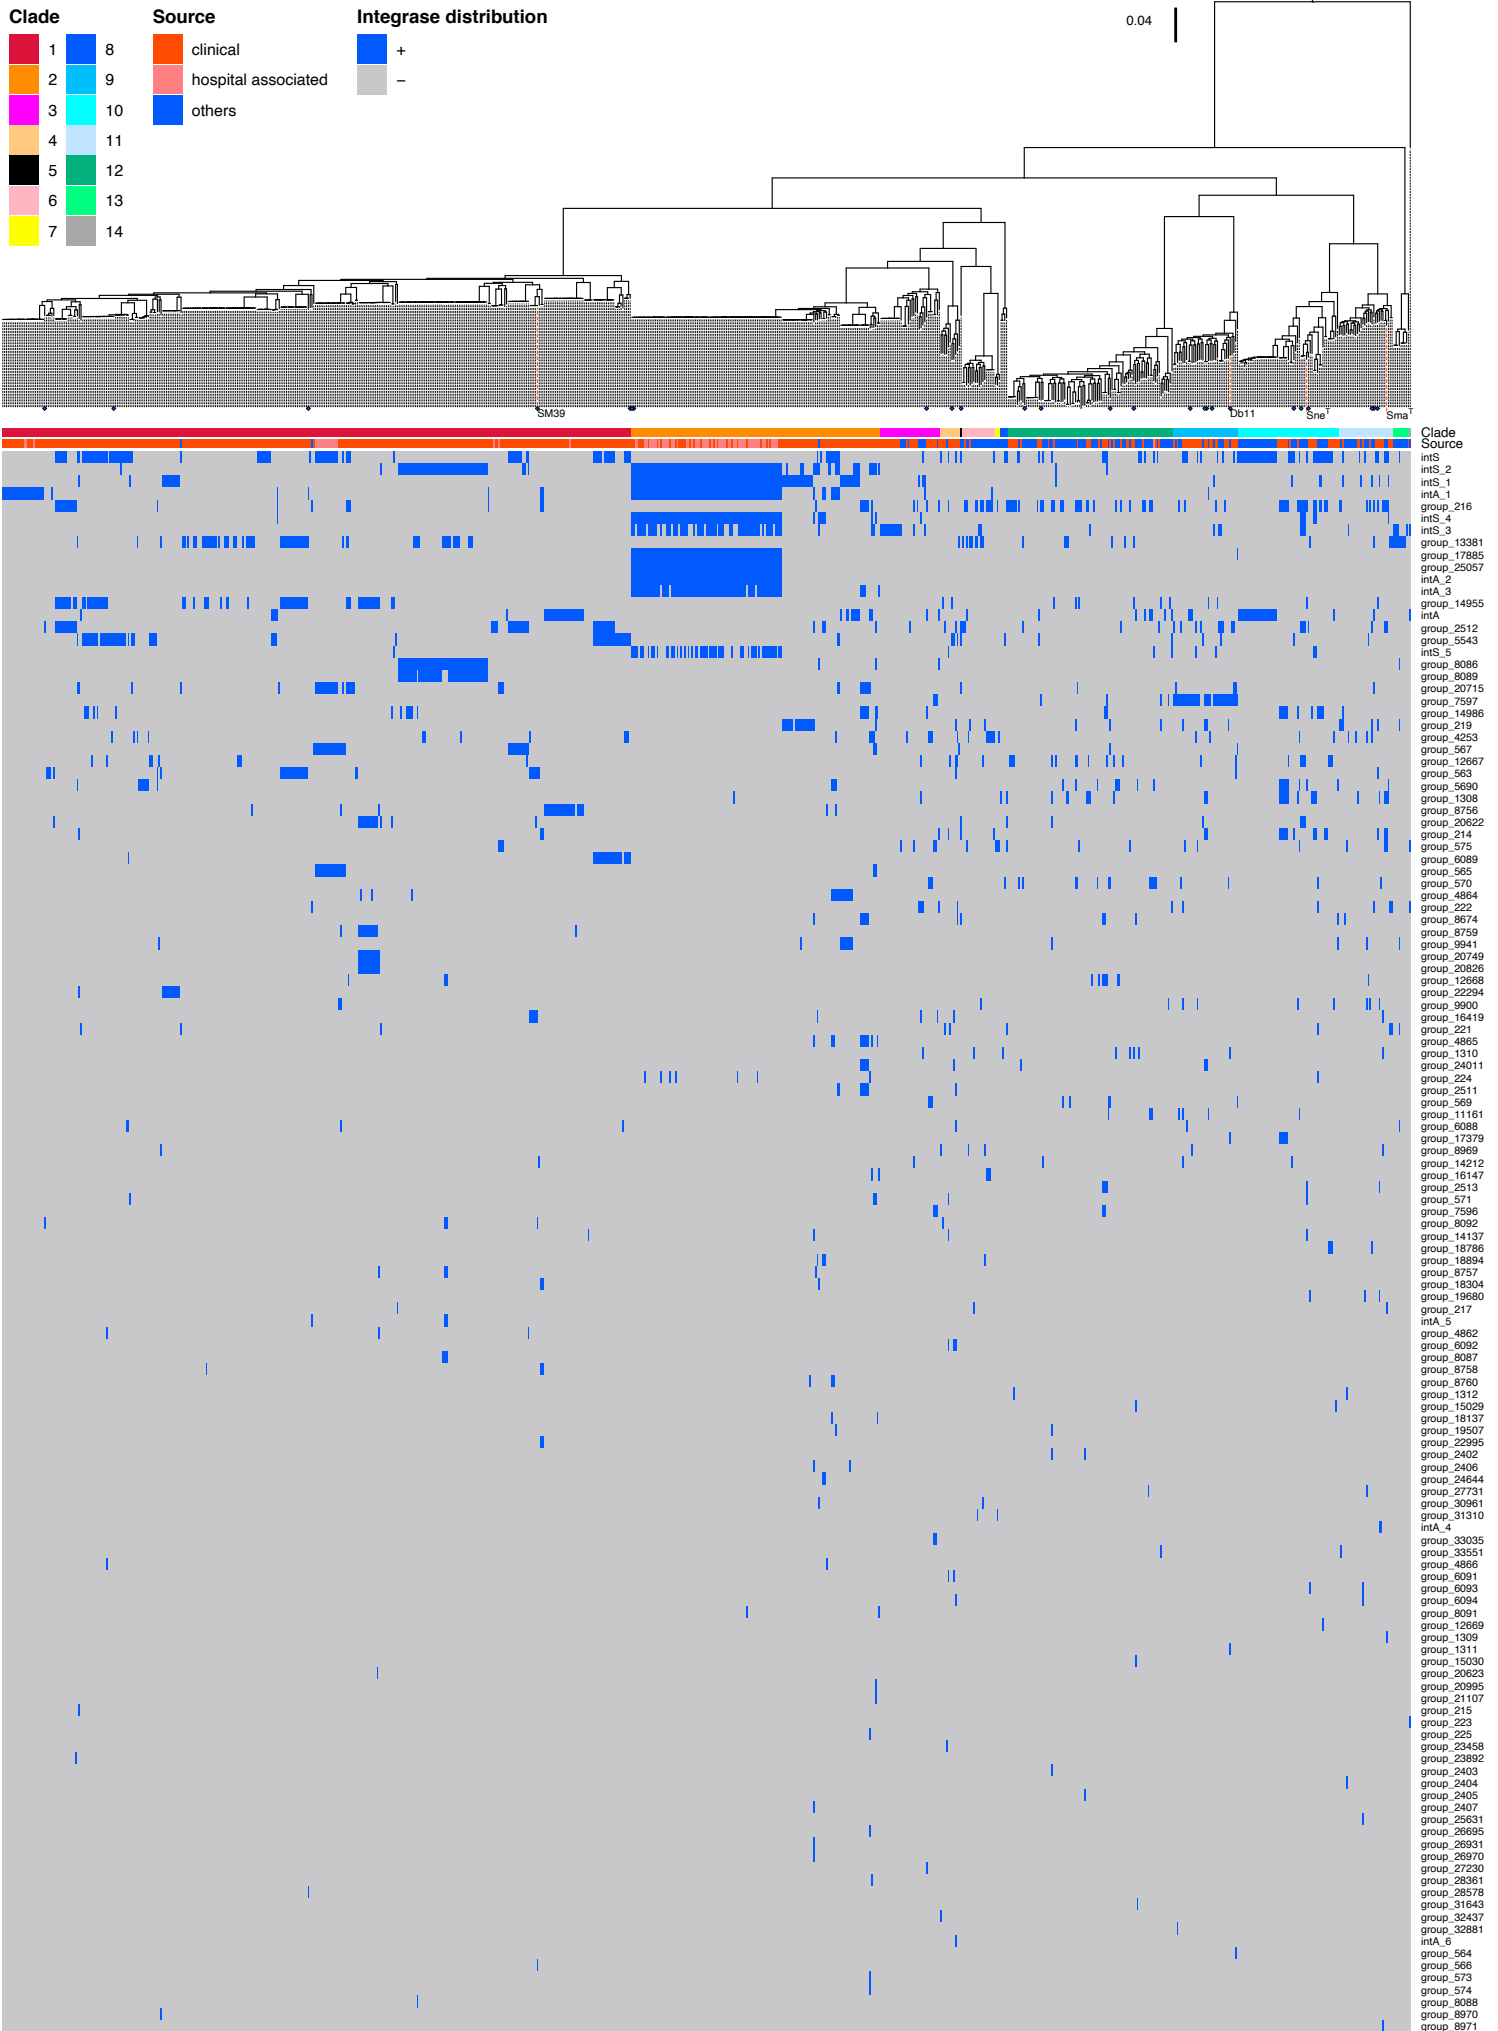

**Fig. S6 Distribution of integrase genes in the Sma complex.**

The distribution of 130 integrase genes (gene groups) identified in the pangenome data of the Sma complex is shown with the gene group names in the pangenome data generated by Roary. The same ML tree and strain information on the clade and isolation source presented in Fig. 4 are shown here.

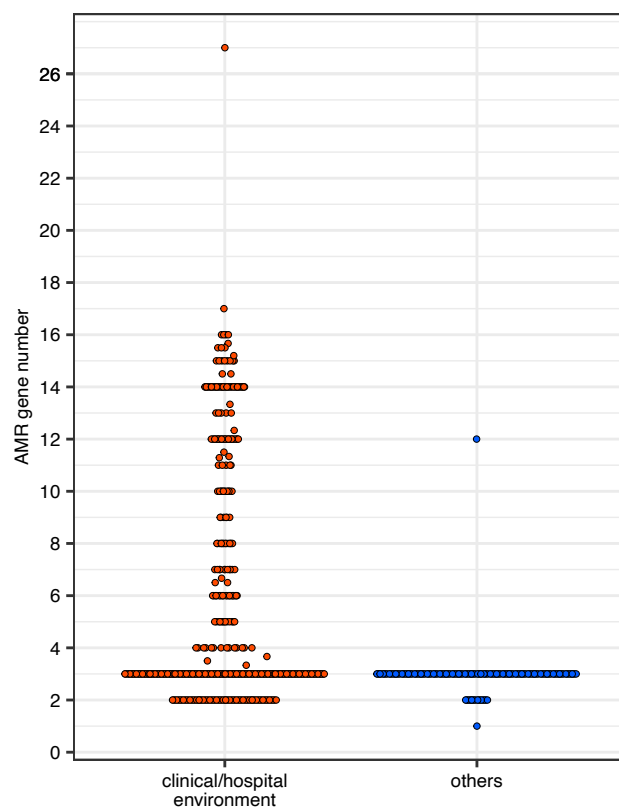

**Fig. S7 Comparison of the numbers of AMR genes between the SNP<sub>10</sub> clusters from clinical/hospital environment sources and those from the other sources.**

The numbers of AMR genes in the multimember SNP<sub>10</sub> clusters were calculated as the average number of the strains belonging to the same SNP<sub>10</sub> cluster.



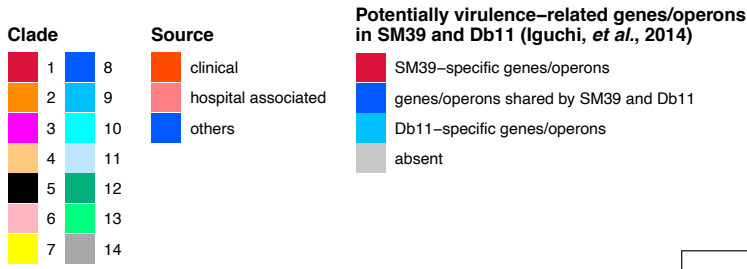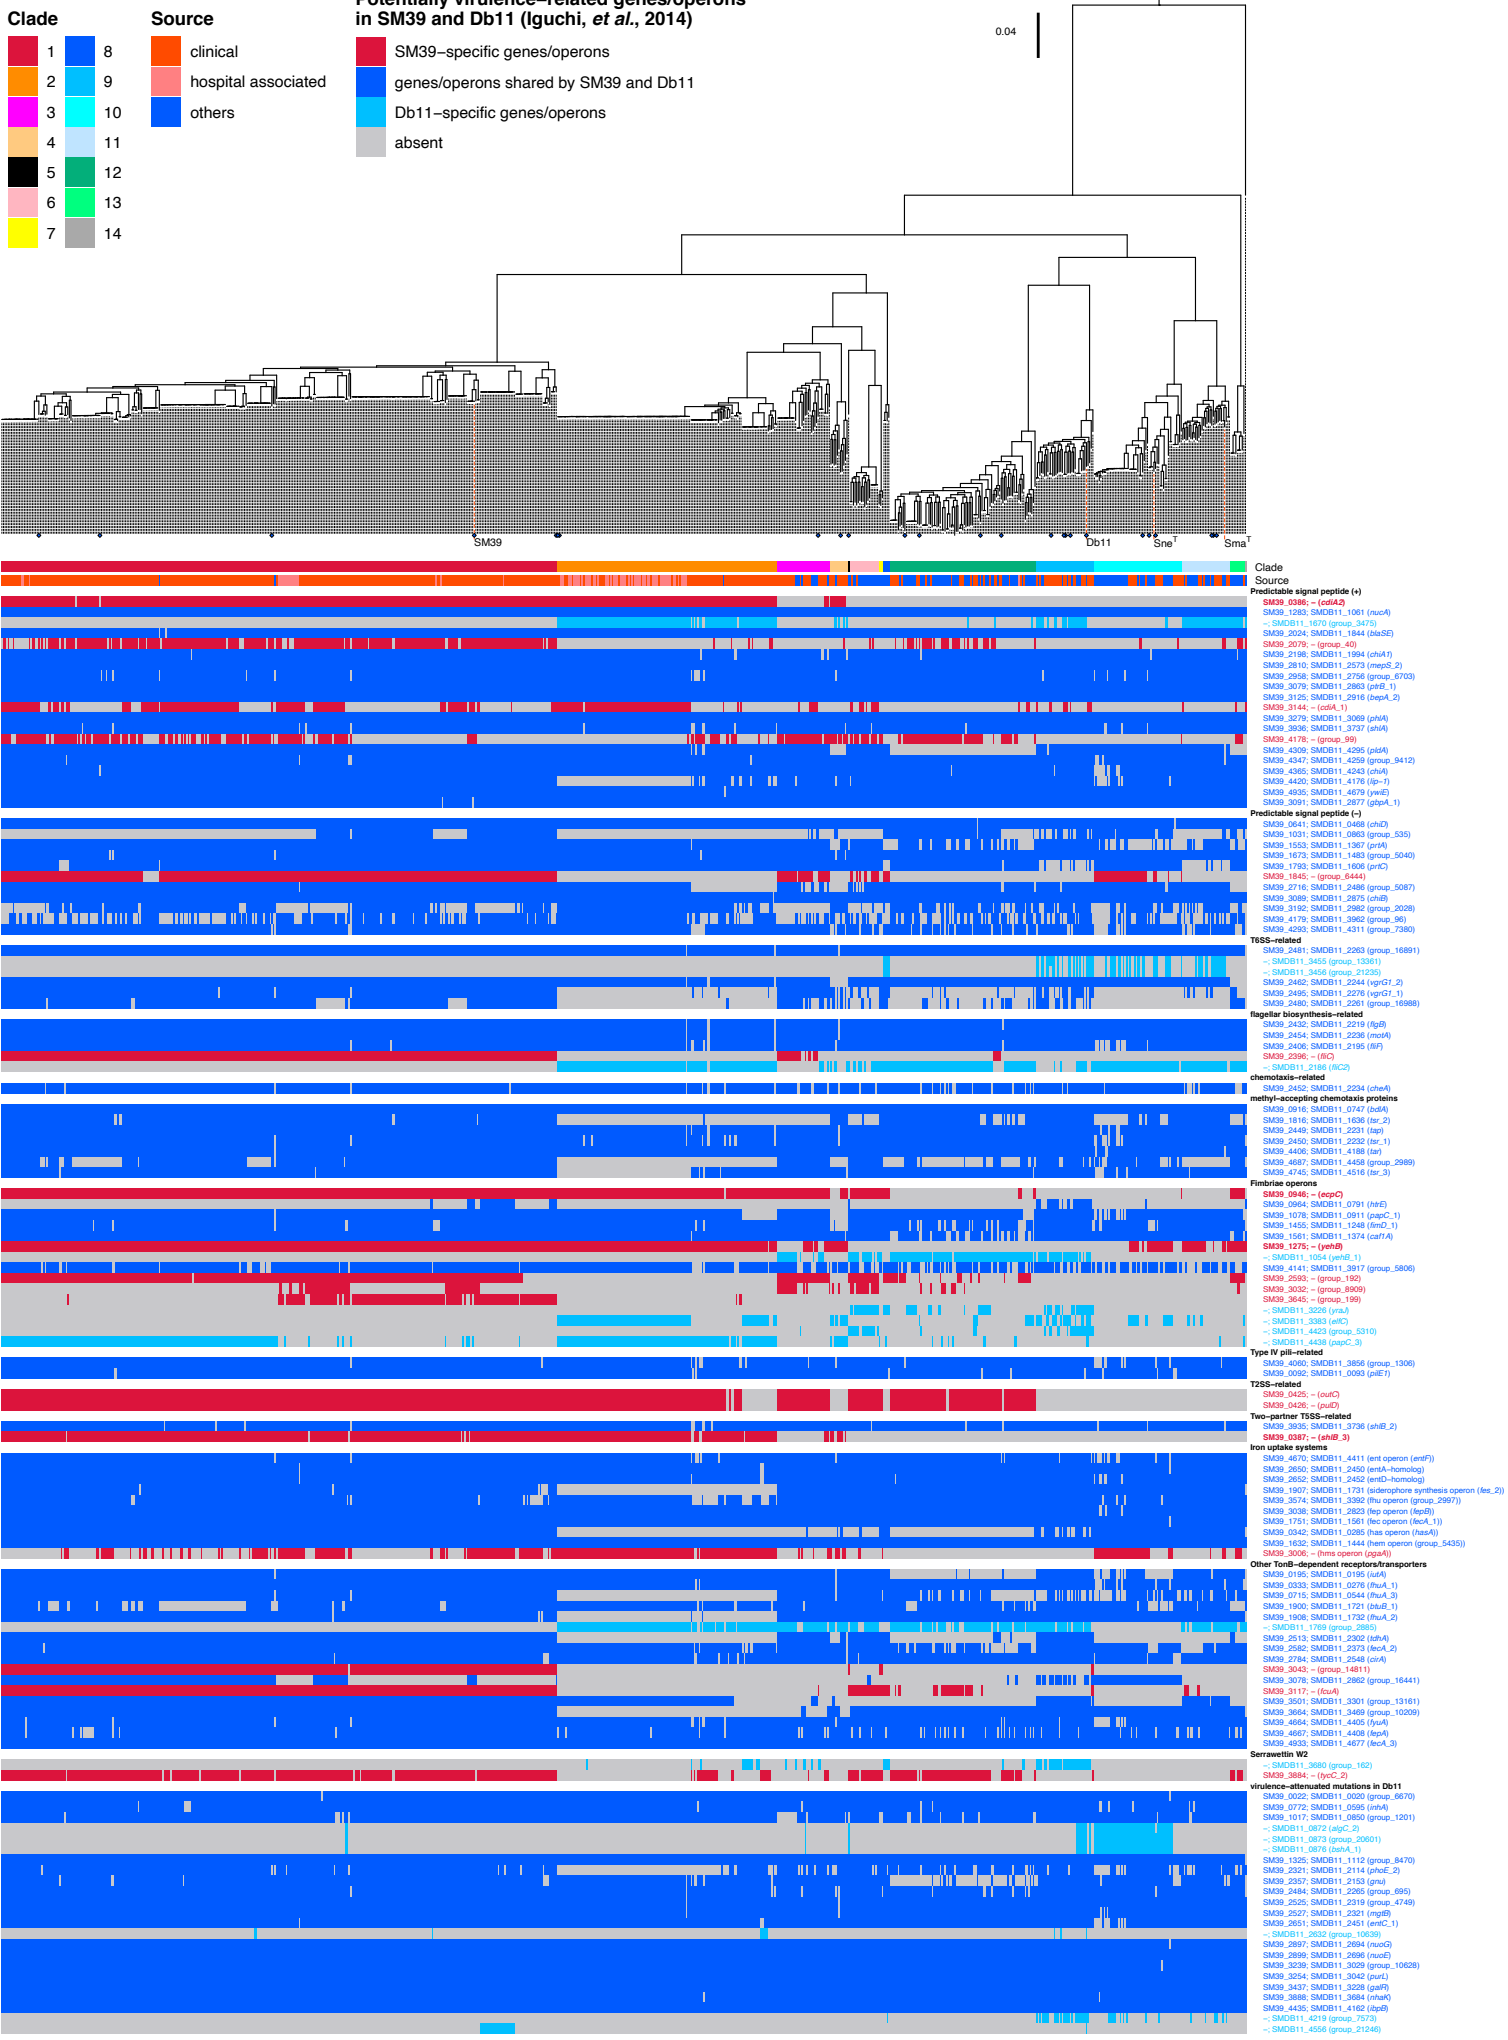

**Fig. S8 Distribution of potentially virulence-related genes/operons described for the SM39 and/or Db11 genomes.**

The distribution of potentially virulence-related genes/operons that were described for the SM39 and/or Db11 genomes by Iguchi *et al.* [Ref. 15 in the main text] is shown. The same ML tree and strain information on the clade and isolation source presented in Fig. 4 are shown here. As for operons (or clusters of genes), representative genes indicated in each operon were analyzed. Gene IDs in the SM39 and Db11 genomes are also indicated with their gene group names in the pangenome data in parentheses. The genes that were present in only SM39, both SM39 and Db11, and only Db11 are indicated by red, blue, and light blue, respectively. The four genes that showed a biased distribution to clades 1 and 2 are indicated in bold.

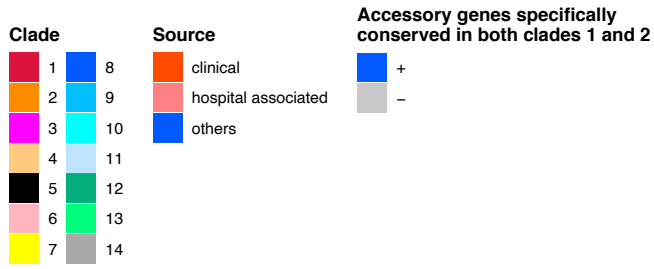

0.04

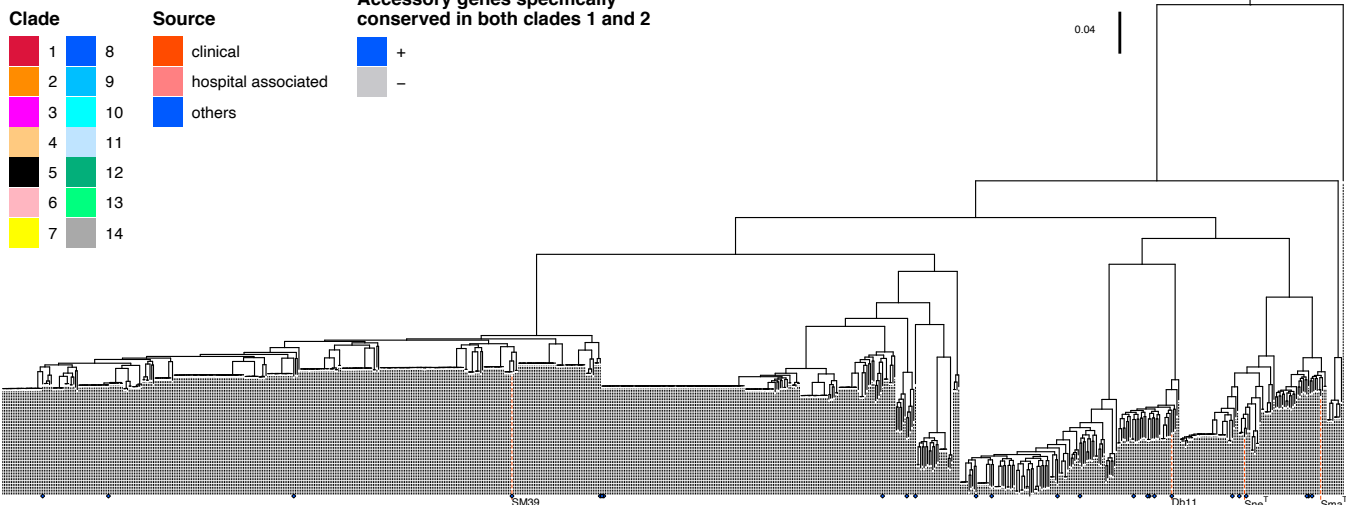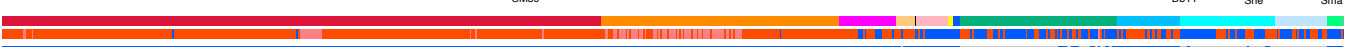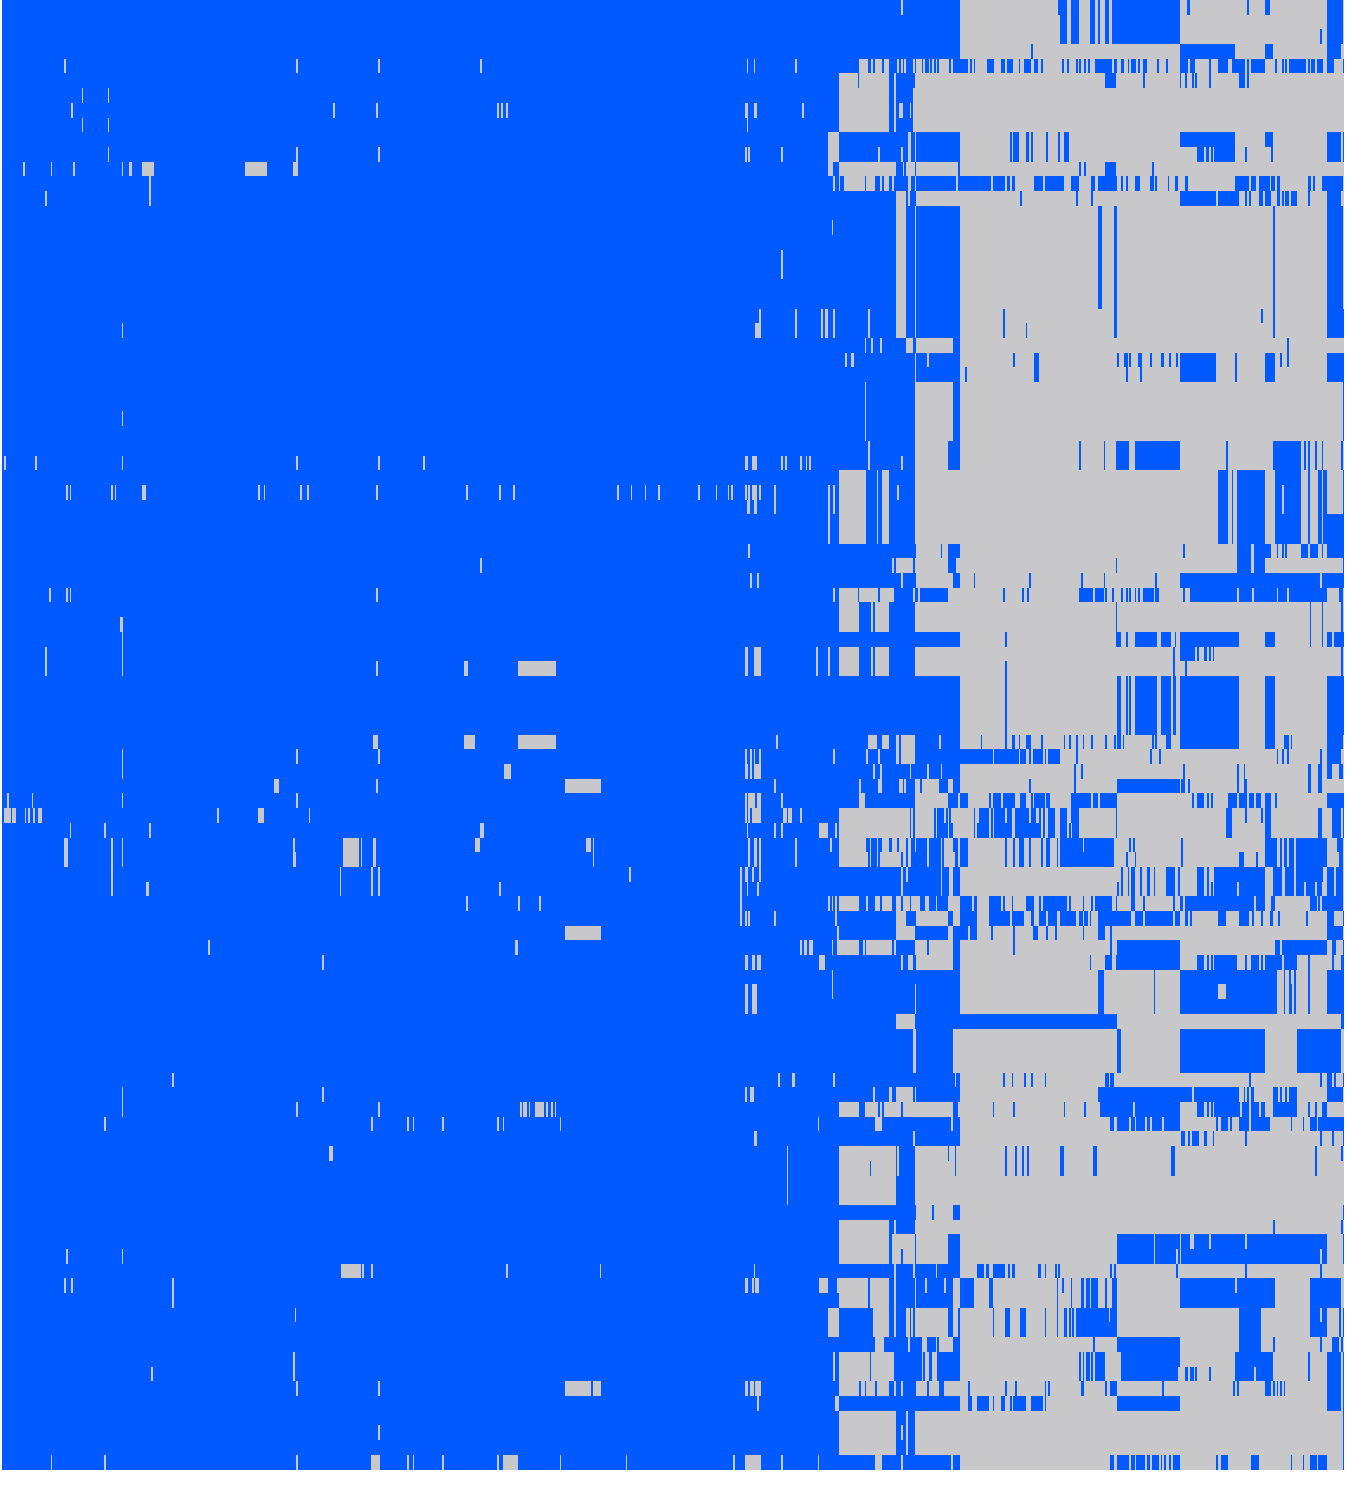

Clade Source

0094 : 0095 (*ampD*)  
0099 : 0100 (*group\_1182*)  
0103 : 0104 (*dgf*)  
0197 : - (*group\_14771*)  
0289 : - (*group\_5817*)  
0381 : - (*group\_7860*)  
0386 : - (*cdtA2*)  
0387 : - (*shlB\_3*)  
0391 : - (*yajR\_2*)  
0484 : - (*allS\_1*)  
0503 : - (*saadH*)  
0514 : - (*group\_3094*)  
0592 : - (*group\_1192*)  
0871 : - (*group\_6895*)  
0942 : - (*cadC\_1*)  
0943 : - (*group\_4188*)  
0944 : - (*ecpA*)  
0945 : - (*ecpB*)  
0946 : - (*ecpC*)  
0947 : - (*ecpD*)  
0948 : - (*ecpE*)  
0951 : - (*group\_4746*)  
0952 : - (*group\_4743*)  
0978 : - (*proP\_4*)  
1089 : - (*group\_1130*)  
1092 : - (*mtmN\_1*)  
1094 : - (*trp*)  
1096 : - (*podvA2*)  
1097 : - (*group\_10590*)  
1098 : - (*group\_4501*)  
1125 : 0955 (*ptsG\_2*)  
1126 : 0956 (*nanE*)  
1270 : - (*group\_7464*)  
1271 : - (*group\_5195*)  
1272 : - (*group\_2206*)  
1274 : - (*yehC*)  
1275 : - (*yehB*)  
1282 : - (*bagE\_1*)  
1284 : - (*irkC*)  
1331 : - (*group\_4696*)  
1358 : - (*lqsA\_1*)  
1437 : - (*lutR*)  
1439 : - (*group\_14876*)  
1440 : - (*metQ\_1*)  
1443 : - (*ygiK*)  
1444 : - (*group\_3270*)  
1445 : - (*lacF*)  
1446 : - (*ebgA*)  
1447 : - (*ebgC*)  
1448 : - (*ygi*)  
1453 : - (*yadV\_2*)  
1521 : - (*group\_477*)  
1838 : - (*group\_1327*)  
1842 : 1668 (*yajR\_1*)  
1862 : - (*pogA*)  
2076 : - (*cstA*)  
2080 : - (*shlB\_1*)  
2264 : - (*group\_3683*)  
2268 : - (*argS*)  
2349 : 2145 (*gtrI*)  
2351 : 2147 (*group\_5574*)  
2492 : - (*group\_9365*)  
2503 : 2285 (*group\_6344*)  
2586 : - (*group\_6339*)  
2598 : 2377 (*yexC*)  
2647 : 2446 (*dmlR\_3*)  
2765 : - (*tsaF*)  
2766 : - (*yxeP\_1*)  
2767 : - (*group\_6423*)  
2886 : - (*group\_11243*)  
3003 : - (*group\_6456*)  
3004 : - (*pgaC*)  
3005 : - (*pgaB*)  
3090 : - (*yha\_1*)  
3155 : 2938 (*yegE\_2*)  
3157 : 2940 (*alkA*)  
3304 : 3093 (*pcpR\_2*)  
3511 : - (*gcpF*)  
3644 : 4439 (*lyfS\_2*)  
3647 : 4436 (*smfA\_5*)  
3648 : - (*group\_9540*)  
3649 : - (*group\_17110*)  
3698 : - (*dmlR\_14*)  
3797 : - (*phoC\_1*)  
3897 : 3695 (*yahK*)  
3901 : 3699 (*tyrB*)  
3912 : - (*dinF*)  
4032 : - (*group\_5416*)  
4033 : - (*group\_6762*)  
4394 : - (*group\_3124*)  
4395 : - (*group\_6457*)  
4430 : 4167 (*malS*)  
4456 : 4146 (*chrF*)  
4458 : 4144 (*adeP*)  
4672 : - (*entC\_2*)  
4734 : 4504 (*lytE*)  
4843 : - (*dsdX*)  
4844 : - (*group\_10574*)  
4845 : - (*srfR\_6*)  
- : - (*group\_319*)

ID in SM39 ID in Db11

**Fig. S9 Distribution of the accessory genes specifically conserved in clades 1 and 2.**

Among the 287 accessory genes that are highly conserved in both clades 1 and 2 (present in >90% SNP<sub>10</sub> clusters) but significantly less frequently present in the other clades (Bonferroni  $p < 0.01$ ), the top 100 genes (Bonferroni  $p < 9.99 \times 10^{-44}$ ) are shown according to the order in the SM39 genome. The same ML tree and strain information on the clade and isolation source presented in Fig. 4 are shown here. Gene IDs in SM39 and Db11 and their gene group names in the pangenome data are indicated. The list of the 287 genes is available in Table S11. The two gene IDs indicated by asterisks are missing numbers in the genome annotation data of SM39.
